# Supplementary material for: High-fat diet-induced obesity affects alpha 7 nicotine acetylcholine receptor expressions in mouse lung myeloid cells
Source: PubMed Central journal article supplement (PMC7592050; doi:10.1038/s41598-020-75414-w), 2020-10-27
Supplement: 41598_2020_75414_MOESM1_ESM.pdf [file 41598_2020_75414_MOESM1_ESM.pdf]

# **High-Fat Diet-Induced Obesity Affects Alpha 7 Nicotine Acetylcholine Receptor Expressions in Mouse Lung Myeloid Cells**

Yong Qi<sup>1\*</sup>, Dan Si<sup>1,2</sup>, Li Zhu<sup>1</sup>, Yanan Qi<sup>1</sup>, Zhuhua Wu<sup>1</sup>, Dan Chen<sup>1,3</sup>, & Yunlei  
Yang<sup>3,4,5,6\*</sup>

Supplementary information including:

**2 figure legends;**

**2 figures;**

**9 tables;**

**Statistical justification around sample size selection.**

## Supplementary Figure Legends

**Supplementary Figure 1.** A time line of the experimental procedures.

**Supplementary Figure 2.** Sequence gating strategy for cell identifications. Cells were isolated from enzymatically digested mouse lungs and, after exclusion of doublets and debris, leukocytes were identified by CD45<sup>+</sup> staining. Sequential gating strategy was applied to identify populations expressing specific markers. Alveolar macrophages express lower levels of CD24 compared to CD103<sup>+</sup>DCs<sup>1</sup> CD64 is a marker which can discriminate monocyte-derived DCs and alveolar macrophage from conventional DCs. CD11b<sup>-</sup>CD11c<sup>+</sup> cells doesn't comprise monocyte-derived DCs, as monocyte-derived DCs are CD11b<sup>+</sup>CD11c<sup>+</sup>MHCII<sup>+</sup> cells<sup>2</sup>. Alveolar macrophages were identified as CD11b<sup>-</sup>CD11c<sup>+</sup> cells, further purified by using CD64 and CD24 and the CD24<sup>+</sup>CD64<sup>-</sup> cells were CD103<sup>+</sup>DCs<sup>3</sup>. Gating on CD11b<sup>hi</sup> cells allows for the separation of myeloid cells from lymphoid cells that either do not express this marker (T and B cells), or express it at intermediate level (natural killer cells). Granulocytes (neutrophils and eosinophils) can be gated out as CD24<sup>+</sup>CD11c<sup>-</sup>, and the identification of interstitial macrophages (CD11c<sup>+</sup>CD11b<sup>+</sup>MHC II<sup>+</sup>CD24<sup>-</sup>CD64<sup>+</sup>), and monocytes can be continued as in the full panel (CD11b<sup>+</sup>MHC II<sup>-</sup>CD64<sup>+/-</sup>). In a simplified panel, almost all alveolar macrophages were CD64<sup>+</sup>, so alveolar macrophages can be classified as CD11b<sup>-</sup>CD11c<sup>+</sup>CD24<sup>low</sup>. Nearly all monocytes were MHC II<sup>-</sup>, so monocytes can be classified as MHC II<sup>-</sup>, regardless of the expression level of CD64. FSC, forward scatter; MHC II, major histocompatibility complex class II; SSC, side scatter.

- 1 Becher, B. et al. High-dimensional analysis of the murine myeloid cell system. *Nat. Immunol.* 15, 1181-1189, (2014).
- 2 Guilliams, M., Lambrecht, B. N. & Hammad, H. Division of labor between lung dendritic cells and macrophages in the defense against pulmonary infections. *Mucosal Immunol.* 6, 464-473, (2013).
- 3 Misharin, A. V., Morales-Nebreda, L., Mutlu, G. M., Budinger, G. R. & Perlman, H. Flow cytometric analysis of macrophages and dendritic cell subsets in the mouse lung. *Am. J. Respir. Cell Mol. Biol.* 49, 503-510, (2013).

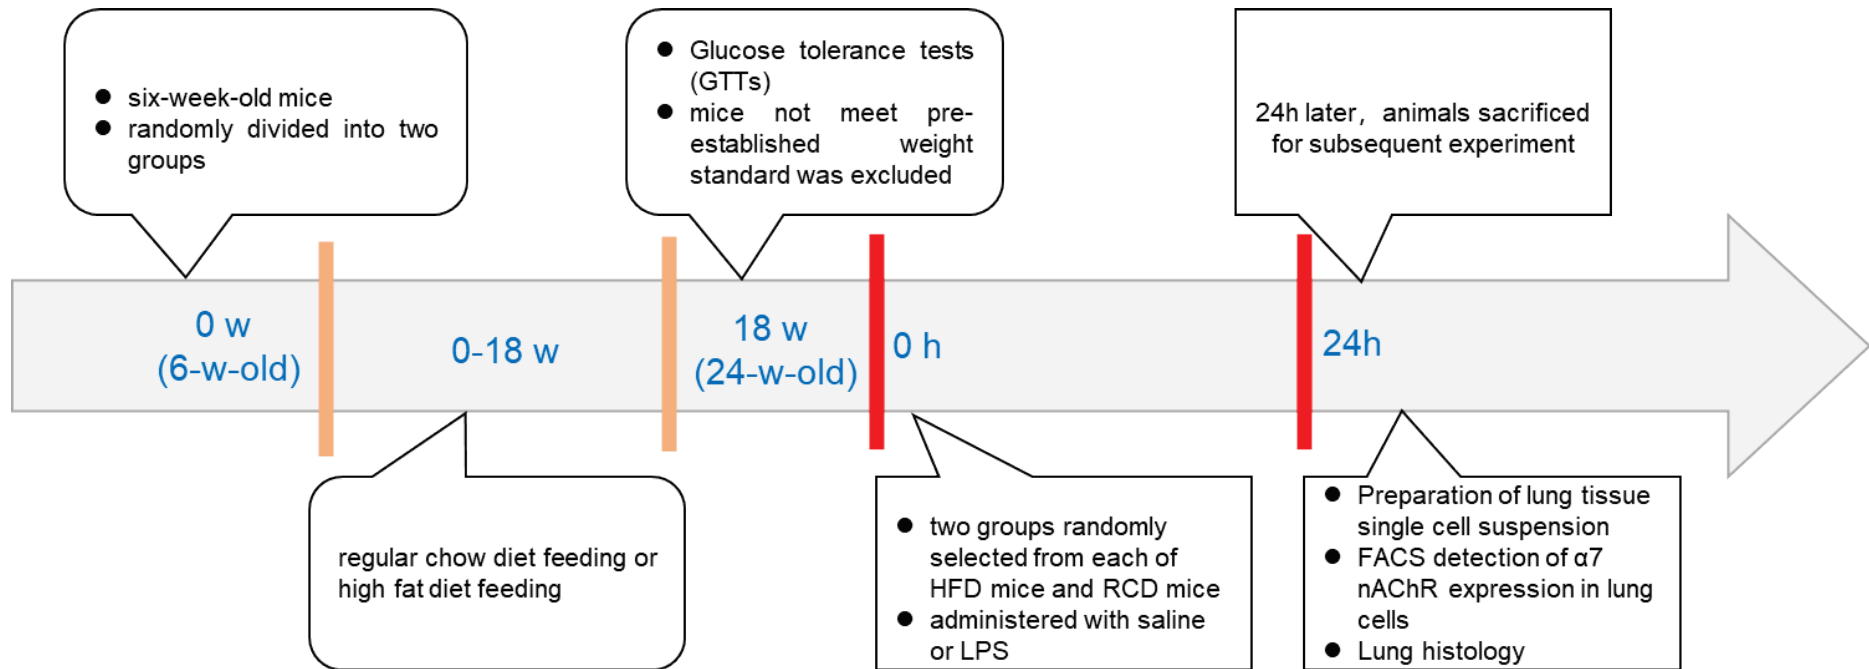

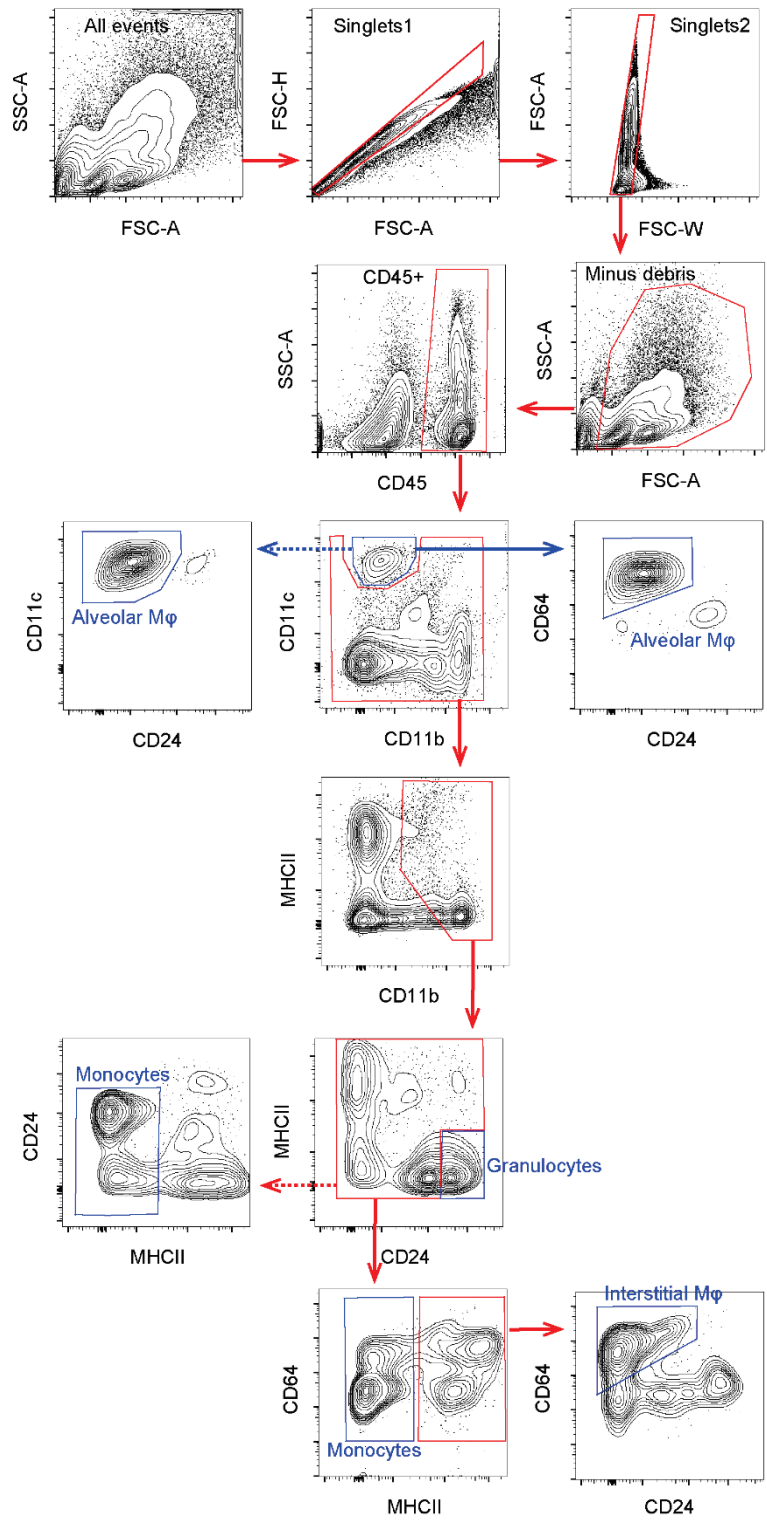

**Supplementary Table S1 : The nutrient content of regular chow diet.**

| Regular chow diet | Water | Crude protein | Crude fat | Carbohydrate | Crude fiber | Crude ash | Calcium | Total phosphorus | Vitamins | Minerals & Minor elements | Required amino acid |
|-------------------|-------|---------------|-----------|--------------|-------------|-----------|---------|------------------|----------|---------------------------|---------------------|
|                   | 10%   | 22.5%         | 4.20%     | 51%          | 3.27%       | 6.24%     | 1.25%   | 0.77%            | ≤0.3%    | ≤0.5%                     | ≥5.00%              |

Caloric Information: Protein, 27 % Kcal; Fat, 11 % Kcal; Carbohydrate, 61 % Kcal; Energy density, 3.32 Kcal/g.

**Supplementary Table S2 : The ingredients of high-fat diet.**

| High-fat diet | Casein, Lactic, 30 Mesh | Cystine, L | Lodex 10 | Sucrose Fine Granulated | Solka floc, FCC 200 | Lard    | Soybean Oil, USP | S10026B | Choline Bitartrate | V10001C | Dye, Blue FD&C #1, Alum. Lake 35-42 % |
|---------------|-------------------------|------------|----------|-------------------------|---------------------|---------|------------------|---------|--------------------|---------|---------------------------------------|
|               | 200 g                   | 3.0 g      | 125.0 g  | 72.8 g                  | 50.0 g              | 245.0 g | 25.0 g           | 50.0 g  | 2.0 g              | 1.0 g   | 0.05 g                                |
|               | 26.8 %                  | 0.4 %      | 16.2 %   | 9.4 %                   | 6.5 %               | 31.7 %  | 32.3 %           | 6.5 %   | 0.3 %              | 0.1 %   | < 0.01 %                              |

Caloric Information: Protein, 20 % Kcal; Fat, 60 % Kcal; Carbohydrate, 20 % Kcal; Energy density, 5.21 Kcal/g.

V10001C is an AIN-76A vitamin mix (10X concentration) additive according to Research Diets, Inc. The detailed ingredient of it can be found in <https://researchdiets.com/formulas/V10001C>.

| Antigen                | Clone      | Fluorochrome | Dilution | Manufacturer  |
|------------------------|------------|--------------|----------|---------------|
| CD11b                  | M1/70      | APC-Cy7      | 2.5:100  | Biolegend     |
| CD11c                  | N418       | PE-Cy7       | 1.25:100 | Biolegend     |
| MHC-II                 | 2G9        | BB515        | 1.25:100 | BD Bioscience |
| CD24                   | M1/69      | PE-CF594     | 2.5:100  | BD Bioscience |
|                        | 30-F1      | APC          | 3.75:100 | Biolegend     |
| CD64                   | X54-5/7.1  | BV 421       | 1:100    | Biolegend     |
| CD86                   | GL-1       | BV 421       | 1:100    | Biolegend     |
| CD45                   | 30-F11     | PerCP-Cy5.5  | 1:100    | eBioscience   |
| $\alpha$ 7AChR         | 319        | PE           | 5:100    | Santa Cruz    |
| CD206                  | MR6F3      | APC          | 1.25:100 | eBioscience   |
| $\alpha$ 7AChR isotype | R3-34      | PE           | 5:100    | BD Bioscience |
| CD86 isotype           | RTK2758    | BV 421       | 1:100    | Biolegend     |
| CD206 isotype          | eB149/10H5 | APC          | 1.25:100 | eBioscience   |

**Supplementary Table S3** : Antibodies panel used for flow cytometric analysis. APC-Cy7 is allophycocyanin-Cyanine7; PE-Cy7 is Phycoerythrin-Cyanine7; BB515 is a dye which can provide a brighter alternative to FITC with less spillover into the PE detector; PE-CF594 is a dye which has been developed as a better alternative to PE-Texas Red; APC is allophycocyanin; BV421 is Brilliant Violet 421, it is excited at 405 nm and emits at 421 nm; PerCP-Cy5.5 is Peridinin Chlorophyll-Cyanine5.5; PE is phycoerythrin.

**Supplementary Table S4** : Cumulative increase of body weight (g). \*\*\*  $P < 0.001$ , comparing HFD mice to RCD-fed mice at the same weeks. HFD, high fat diet, n=18; RCD, regular chow diet, n=16. Data was presented as Mean±SD. Normality test was determined by Shapiro-Wilk, statistical significance was determined by ANOVA for repeatedly measured data, followed by post-hoc Bonferroni method.

| Weeks | 6 w      | 8 w          | 10 w         | 12 w         | 14 w         | 16 w         | 18 w         | 20 w         | 22 w         | 24 w         |
|-------|----------|--------------|--------------|--------------|--------------|--------------|--------------|--------------|--------------|--------------|
| RCD   | 21.1±0.8 | 23.0±1.0     | 24.6±1.3     | 25.9±1.5     | 27.4±0.8     | 28.3±1.0     | 28.0±2.0     | 28.7±1.1     | 28.9±1.6     | 30.1±1.1     |
| HFD   | 20.7±0.9 | 25.5±1.4 *** | 28.5±1.3 *** | 33.8±2.1 *** | 37.3±3.3 *** | 40.8±3.9 *** | 41.6±4.3 *** | 42.5±4.4 *** | 43.7±4.6 *** | 46.1±4.1 *** |



**Supplementary Table S5** : Glucose tolerance test (GTT). \*\*\*  $P < 0.001$ , comparing HFD group to RCD group at the same time. High fat diet, n=18; Regular chow diet, n=16. Data was presented as Mean±SD. Normality test was determined by Shapiro-Wilk, statistical significance was determined by ANOVA for repeatedly measured data, followed by post-hoc Bonferroni method.

| Groups | 0min    | 30min        | 60min        | 90min        | 120min       |
|--------|---------|--------------|--------------|--------------|--------------|
| RCD    | 6.0±0.6 | 17.8±2.6     | 13.6±3.2     | 10.0±1.3     | 8.1±0.7      |
| HFD    | 6.3±0.7 | 27.8±3.4 *** | 26.4±3.5 *** | 23.7±3.1 *** | 20.2±2.5 *** |

**Supplementary Table S6** : The percentage of leukocytes, alveolar macrophages, interstitial macrophages, monocytes, granulocytes in the total cell count. RCD, n=8; RCD+LPS, n=8; HFD, n=8; HFD+LPS, n=10. \*\*\*  $P < 0.001$ , \*\*  $P < 0.01$ , \*  $P < 0.05$  , comparing HFD group to RCD group; ####  $P < 0.001$ , ##  $P < 0.01$ , #  $P < 0.05$  , comparing RCD+LPS group to RCD group or comparing HFD+LPS group to HFD group; †††  $P < 0.001$ , ††  $P < 0.01$ , †  $P < 0.05$  , comparing HFD+LPS group to RCD+LPS group. RCD, regular chow diet. HFD, high fat diet. LPS, lipopolysaccharide. Data were presented as Mean±SD. Normality test was determined by Shapiro-Wilk, Alveolar macrophages / Total (Minus Debris) (%): by ANOVA, post-hoc LSD-t method. Interstitial macrophages / Total (Minus Debris) (%): by ANOVA after logarithmic transformation, post-hoc LSD-t method. Monocytes / Total (Minus Debris) (%): by ANOVA after logarithmic transformation, post-hoc LSD-t method. Granulocytes / Total (Minus Debris) (%): by Welch's ANOVA, post-hoc Games-Howell method.

| Groups  | leukocytes(CD45+) / Total(Minus Debris) | Alveolar macrophages / Total(Minus Debris) | Interstitial macrophages / Total(Minus Debris) | Monocytes / Total(Minus Debris) | Granulocytes / Total(Minus Debris) |
|---------|-----------------------------------------|--------------------------------------------|------------------------------------------------|---------------------------------|------------------------------------|
| RCD     | 36.20±3.40                              | 0.66±0.10                                  | 1.27±0.11                                      | 1.01±0.21                       | 1.71±0.59                          |
| HFD     | 43.51±2.41 ***                          | 1.05±0.13 ***                              | 1.64±0.53                                      | 1.38±0.61                       | 3.09±2.04                          |
| RCD+LPS | 52.20±3.78 ####                         | 0.46±0.27 #                                | 2.06±0.41 ####                                 | 5.49±1.51 ####                  | 17.38±4.35 ####                    |
| HFD+LPS | 66.31±6.85 #### †††                     | 0.35±0.19 ####                             | 1.98±0.35                                      | 8.91±1.83 #### ††               | 19.97±4.44 ####                    |

**Supplementary Table S7** : The expression levels of CD86, CD206 in alveolar macrophages and monocytes. RCD, n=8; RCD+LPS, n=8; HFD, n=8; HFD+LPS, n=10. \*\*\*  $P < 0.001$ , \*\*  $P < 0.01$ , \*  $P < 0.05$  , comparing HFD group to RCD group; ###  $P < 0.001$ , ##  $P < 0.01$ , #  $P < 0.05$  , comparing RCD+LPS group to RCD group or comparing HFD+LPS group to HFD group; †††  $P < 0.001$ , ††  $P < 0.01$ , †  $P < 0.05$  , comparing HFD+LPS group to RCD+LPS group. RCD, regular chow diet. HFD, high fat diet. LPS, lipopolysaccharide. Mo, monocytes; AM, alveolar macrophages. Data was presented as Mean±SD. Normality test was determined by Shapiro-Wilk, CD86 MFI (AM): by ANOVA after logarithmic transformation, post-hoc LSD-t method. CD206 MFI (AM): by Welch's ANOVA, post-hoc Games-Howell method. CD86 MFI (Mo): by ANOVA, post-hoc LSD-t method.

| Groups  | CD86 MFI ( AM ) | CD206 MFI ( AM ) | CD86 MFI ( Mo ) | CD206 MFI ( Mo ) |
|---------|-----------------|------------------|-----------------|------------------|
| RCD     | 894±111         | 1440±104         | 74±15           | 355±70           |
| HFD     | 523±40 ***      | 1305±74 *        | 71±17           | 352±74           |
| RCD+LPS | 590±79 ###      | 1553±126         | 169±28 ###      | 245±36           |
| HFD+LPS | 553±64          | 1444±153         | 221±60 ### †    | 281±58           |

**Supplementary Table S8** : The percentage of  $\alpha 7nAChR^+$  cells in four inflammatory cell subsets. RCD, n=8; RCD+LPS, n=8; HFD, n=8; HFD+LPS, n=10. ###  $P < 0.001$ , ##  $P < 0.01$ , #  $p < 0.05$ , comparing RCD+LPS group to RCD group or comparing HFD+LPS group to HFD group; †††  $P < 0.001$ , ††  $P < 0.01$ , †  $P < 0.05$ , comparing HFD+LPS group to RCD+LPS group. RCD, regular chow diet. HFD, high fat diet. LPS, lipopolysaccharide. AM, alveolar macrophages. IM, interstitial macrophages. Mo, monocytes. Gr, granulocytes. Data were presented as Mean $\pm$ SD. Normality test was determined by Shapiro-Wilk, statistical significance was determined by Welch's ANOVA, post-hoc Games-Howell method.

| Groups  | $\alpha 7nAChR^+$ AM / AM | $\alpha 7nAChR^+$ IM / IM | $\alpha 7nAChR^+$ Mo / Mo | $\alpha 7nAChR^+$ Gr / Gr |
|---------|---------------------------|---------------------------|---------------------------|---------------------------|
| RCD     | 1.51 $\pm$ 0.91           | 4.85 $\pm$ 1.18           | 1.15 $\pm$ 0.33           | 2.34 $\pm$ 0.98           |
| HFD     | 1.84 $\pm$ 1.28           | 5.11 $\pm$ 2.60           | 1.24 $\pm$ 0.61           | 0.83 $\pm$ 0.28           |
| RCD+LPS | 21.76 $\pm$ 5.17 ###      | 35.88 $\pm$ 4.88 ###      | 28.18 $\pm$ 4.31 ###      | 2.90 $\pm$ 1.14           |
| HFD+LPS | 15.50 $\pm$ 2.93 ### †    | 24.42 $\pm$ 4.44 ### ††   | 21.18 $\pm$ 7.57 ###      | 1.86 $\pm$ 0.71           |

**Supplementary Table S9** : The expression levels of  $\alpha 7nAChR$  in each cell subpopulations. RCD, n=8; RCD+LPS, n=8; HFD, n=8; HFD+LPS, n=10. comparing HFD group to RCD group; ###  $P < 0.001$ , ##  $P < 0.01$ , #  $P < 0.05$  , comparing RCD+LPS group to RCD group or comparing HFD+LPS group to HFD group; †††  $P < 0.001$ , ††  $P < 0.01$ , †  $P < 0.05$  , comparing HFD+LPS group to RCD+LPS group. RCD, regular chow diet. HFD, high fat diet. LPS, lipopolysaccharide. AM, alveolar macrophages. IM, interstitial macrophages. Mo, monocytes. Gr, granulocytes. Data were presented as Mean $\pm$ SD. Normality test was determined by Shapiro-Wilk,  $\alpha 7nAChR^+$  AM MFI: by ANOVA, post-hoc LSD-t method.  $\alpha 7nAChR^+$  IM MFI: by ANOVA after logarithmic transformation, post-hoc LSD-t method.

| Groups  | $\alpha 7nAChR^+$ AM MFI | $\alpha 7nAChR^+$ IM MFI | $\alpha 7nAChR^+$ Mo MFI | $\alpha 7nAChR^+$ Gr MFI |
|---------|--------------------------|--------------------------|--------------------------|--------------------------|
| RCD     | 3723 $\pm$ 376           | 6023 $\pm$ 330           | 2598 $\pm$ 491           | 4047 $\pm$ 474           |
| HFD     | 3799 $\pm$ 475           | 6015 $\pm$ 328           | 2232 $\pm$ 316           | 3273 $\pm$ 756           |
| RCD+LPS | 6107 $\pm$ 365 ###       | 8288 $\pm$ 695 ###       | 2431 $\pm$ 176           | 4213 $\pm$ 589           |
| HFD+LPS | 5431 $\pm$ 492 ### ††    | 7251 $\pm$ 450 ### †††   | 2476 $\pm$ 104           | 3279 $\pm$ 429           |

## Statistical justification around sample size selection

In our ANOVA model, we performed the power analysis via SPSS and G\*Power software<sup>1,2</sup> post hoc. The results were listed in the following tables. According to previous methods<sup>1</sup>, the effect size in ANOVA model, Cohen's  $f$  has a relationship with partial  $\eta^2$ ,  $f = \sqrt{\frac{\eta^2}{1-\eta^2}}$ . Following pre-established standard<sup>1</sup>, small effect size is  $f=0.10$ ,  $\eta^2=0.01$ ; medium effect size is  $f=0.25$ ,  $\eta^2=0.06$ ; large effect size is  $f=0.40$ ,  $\eta^2=0.14$ .

|           | cd45/minus<br>debris | alveolar<br>macrophages/<br>minus debris | interstitial<br>macrophages/<br>minus debris | monocyte/min<br>us debris | granulocytes<br>/minus debris |
|-----------|----------------------|------------------------------------------|----------------------------------------------|---------------------------|-------------------------------|
| sig.level | 0.05                 | 0.05                                     | 0.05                                         | 0.05                      | 0.05                          |
| $\eta^2$  | 0.876                | 0.705                                    | 0.460                                        | 0.924                     | 0.914                         |
| power     | 1.000                | 1.000                                    | 0.986                                        | 1.000                     | 1.000                         |

|           | alveolar<br>macrophages $\alpha 7+$ /<br>alveolar<br>macrophages | interstitial<br>macrophages<br>$\alpha 7+$ / interstitial<br>macrophages | monocytes $\alpha 7+$ /<br>monocytes | granulocytes $\alpha 7+$<br>/ granulocytes |
|-----------|------------------------------------------------------------------|--------------------------------------------------------------------------|--------------------------------------|--------------------------------------------|
| sig.level | 0.05                                                             | 0.05                                                                     | 0.05                                 | -                                          |
| $\eta^2$  | 0.853                                                            | 0.918                                                                    | 0.939                                | -                                          |
| power     | 1.000                                                            | 1.000                                                                    | 1.000                                | -                                          |

|           | alveolar<br>macrophages $\alpha 7+$<br>MFI | interstitial<br>macrophages $\alpha 7+$<br>MFI | monocytes $\alpha 7+$<br>MFI | granulocytes $\alpha 7+$<br>MFI |
|-----------|--------------------------------------------|------------------------------------------------|------------------------------|---------------------------------|
| sig.level | 0.05                                       | 0.05                                           | 0.05                         | -                               |
| $\eta^2$  | 0.860                                      | 0.812                                          | 0.171                        | -                               |
| power     | 1.000                                      | 1.000                                          | 0.475                        | -                               |

After calculation, we found that under the current sample size ( $n=34$ ), the test power of the  $\alpha 7$  expression intensity of monocytes did not reach 0.8, and the test power of other groups all met the requirements ( $> 0.8$ ). When calculated according to our second lowest effect size  $\eta^2 = 0.460$ , Cohen's  $f = 0.92$ . Then we calculated via G\*Power software to evaluate the required sample size, by giving significant level = 0.05, 4 groups, and test power 0.8, the required sample size is 5 per group. And to our lowest effect size  $\eta^2 = 0.171$  (the test power of the  $\alpha 7$  expression intensity of monocytes), Cohen's  $f = 0.50$ . The calculated required sample size, by giving significant level = 0.05, 4 groups, and test power 0.8, is 13 per groups. So, except the  $\alpha 7$  expression intensity of monocytes, our sample size was able to test the difference between groups.

1 Cohen, J. Statistical power analysis for the behavioral sciences. (Academic press, 2013).

2 Faul, F., Erdfelder, E., Lang, A. G. & Buchner, A. G\*Power 3: a flexible statistical power analysis program for the social, behavioral, and biomedical sciences. Behav Res Methods 39, 175-191, doi:10.3758/bf03193146 (2007).
